# Supplementary material
Source: bioRxiv or medRxiv preprint supplement (https://www.biorxiv.org/highwire/filestream/138656/field_highwire_adjunct_files/0/461921-1.pdf)
Supplement: Supplementary file [file 461921-1.pdf]

**Food web interaction strength distributions are conserved by greater variation between  
than within predator-prey pairs**

Daniel L. Preston\*, Landon P. Falke, Jeremy S. Henderson, Mark Novak

\*Corresponding author: daniel.preston@wisc.edu; 503-784-7105

**Abiotic stream variables**

We measured stream width, water temperature, stream discharge, canopy cover, and substrate size at each reach on each sampling date (Fig. S7). We recorded stream widths every 5 m along the length of the reach using a tape measure and then calculated the reach-level mean for analyses. We measured water temperature as the 24 hr. mean value from the time period prior to the survey time from data loggers deployed at each site (TidbiT loggers by HOBO). We measured stream discharge using a handheld water flow meter (OTT MF Pro by OTT Hydromet). Canopy cover was measured every 5 m along the reach using a spherical densitometer and then the mean values was used in analyses. Lastly, after dividing each reach into habitat types of pools or riffles, we estimated the embeddedness of substrate cobble on a relative scale from one (low embeddedness) to five (high embeddedness) in each habitat type.

**Mark-recapture surveys to estimate sculpin density**

We conducted mark-recapture surveys at each stream (Oak, Soap, Berry) to determine the electrofishing catch efficiency of reticulate sculpin. We calculated habitat-specific (pool or riffle) catch efficiencies by setting up block nets at the ends of each reach and between each habitat

24 unit. On the first day of each mark-recapture survey, we used three-pass electrofishing to capture  
25 sculpin with a four-person crew. We used a backpack electroshocker (Smith-Root LR20B), a  
26 block net (1.0 x 1.0 m) and two dip nets (0.30 x 0.25 m) to remove sculpin from each habitat  
27 unit. Each captured sculpin was anesthetized with Aqui-S and then marked with a clip on the tail  
28 fin using sterilized scissors. The sculpin were given time to recover in aerated stream water and  
29 then released in the same habitat unit where they were collected. Twenty-four hours after the  
30 initial surveys, we re-surveyed each site with single-pass electroshocking. We followed Krebs  
31 (1989) to estimate sculpin abundance within each habitat unit based on the number of fish  
32 marked on the first visit, the total caught on the second visit, and the number marked on the  
33 second visit. We used the 'FSA' package in R (Ogle 2017) to conduct the mark-recapture  
34 analyses.

35 As reported in Preston et al. (2018), the mean sculpin capture efficiencies were 31% for  
36 pools and 36% for riffles. The total numbers of sculpin captured per habitat at each site during  
37 our feeding rate surveys were therefore adjusted by these catch efficiencies to estimate sculpin  
38 density, which was then used in our analysis of drivers of feeding rate variation.

39

#### 40 **Model diagnostics**

41 Our analysis involves two sets of model comparisons: the first asks what are the relative  
42 roles of space versus time in driving feeding rate variation for 25 prey taxa, and the second asks  
43 how prey density, prey mass, predator density, and abiotic factors affect prey-specific feeding  
44 rates.

45 The first model comparison involves a generalized linear mixed model (GLMM) that  
46 predicts log-transformed feeding rates as a function of reach identity (three reaches per stream)

47 and season (summer, fall, spring), with random intercept terms for stream (Oak, Soap, or Berry)  
48 and for prey taxon identity ( $n = 25$  taxa). To address whether the random intercept terms  
49 improved the model fit, we compared AICc scores of the GLMM to a linear model without  
50 random effects. Dropping the random effects strongly decreased the model performance ( $\Delta\text{AICc}$   
51  $= 421.8$ ), which was consistent with the large differences in feeding rates observed between prey  
52 taxa (see Fig. 1 main text). Residuals patterns from the full GLMM are shown in Fig. S1.

53 For the prey-specific models predicting feeding rates as a function of prey density,  
54 predator density, prey body mass, and abiotic factors, we used general linear models without  
55 random effects of reach or stream. We compared each linear model to a GLMM including a  
56 random intercept for reach nested with stream and found that on average, the general linear  
57 models had an AICc score that was 14.5 units lower. For 19 of 20 taxa, the linear models  
58 provided a better relative fit. (Only Glossosomatidae caddisflies showed slightly more support  
59 for the GLMMs, with an AICc that was 0.8 lower for the model with the random intercept term.)  
60 Correlations among predictors are shown in Fig. S2.

## 61 **References**

- 62 Baumgärtner, D., and K.-O. Rothhaupt. 2003. Predictive length–dry mass regressions for  
63 freshwater invertebrates in a pre-alpine lake littoral. *International Review of*  
64 *Hydrobiology* 88:453–463.
- 65 Benke, A. C., A. D. Huryn, L. A. Smock, and J. B. Wallace. 1999. Length-mass relationships for  
66 freshwater macroinvertebrates in North America with particular reference to the  
67 southeastern United States. *Journal of the North American Benthological Society*  
68 18:308–343.

69

70 Krebs, C. J. 1989. *Ecological Methodology*. Harper & Row Publishers. New York, NY.

71 Miserendino, M. L. 2001. Length-mass relationships for macroinvertebrates in freshwater  
72 environments of Patagonia (Argentina). *Ecología Austral* 11:3–8.

73 Ogle, D.H. 2017. FSA: Fisheries Stock Analysis. R package version 0.8.17.

74 Preston, D. L., J. S. Henderson, L. P. Falke, L. M. Segui, T. J. Layden, and M. Novak. 2018.  
75 What drives interaction strengths in complex food webs? A test with feeding rates of a  
76 generalist stream predator. *Ecology* 99:1591-1601.

77 Towers, D. J., I. M. Henderson, and C. J. Veltman. 1994. Predicting dry weight of New Zealand  
78 aquatic macroinvertebrates from linear dimensions. *New Zealand Journal of Marine and*  
79 *Freshwater Research* 28:159–166.

80  
81  
82  
83  
84  
85  
86  
87  
88  
89  
90  
91  
92

93 **Table S1.** Sources for length-to-drymass regressions for 25 focal prey taxa (listed in the first three columns). The ‘L-M Regression’  
 94 column indicates the taxa for which the equation was derived. Equations include length in mm (L) and predict drymass in mg.

| Order         | Family            | Life Stage | L-M Regression                    | L-M Regression Equation        | L-M Source                     |
|---------------|-------------------|------------|-----------------------------------|--------------------------------|--------------------------------|
| Achatinoidea  | Semisulcospiridae | Adult      | Species ( <i>Juga plicifera</i> ) | $0.0182*L^{2.6534}$            | Preston et al. 2018            |
| Annelida      |                   | Adult      | Family (Lumbriculidae)            | $\exp(-9.19+3.25*\log(L))$     | Miserendino 2001               |
| Coleoptera    | Elmidae           | Adult      | Family (Elmidae)                  | $\exp(-2.0076+3.2271*\log(L))$ | Towers et al. 1994             |
| Coleoptera    | Elmidae           | Larvae     | Family (Elmidae)                  | $0.0074*L^{2.879}$             | Benke et al. 1999              |
| Copepod       |                   | Adult      | Order (Amphipoda)                 | $0.0058*L^{3.015}$             | Benke et al. 1999              |
| Diptera       | Ceratopogonidae   | Larvae     | Family (Ceratopogonidae)          | $0.0025*L^{2.469}$             | Benke et al. 1999              |
| Diptera       | Chironomidae      | Larvae     | Family (Chironomidae)             | $0.0018*L^{2.617}$             | Benke et al. 1999              |
| Diptera       | Dixidae           | Larvae     | Family (Dixidae)                  | $0.0025*L^{2.692}$             | Benke et al. 1999              |
| Diptera       | Empididae         | Larvae     | Family (Empididae)                | $0.0054*L^{2.546}$             | Benke et al. 1999              |
| Diptera       | Psychodidae       | Larvae     | Family (Psychodidae)              | $0.0025*L^{2.692}$             | Benke et al. 1999              |
| Diptera       | Simuliidae        | Larvae     | Family (Simuliidae)               | $0.002*L^{3.011}$              | Benke et al. 1999              |
| Diptera       | Tipulidae         | Larvae     | Family (Tipulidae)                | $0.0029*L^{2.681}$             | Benke et al. 1999              |
| Ephemeroptera | Baetidae          | Larvae     | Family (Baetidae)                 | $0.0053*L^{2.875}$             | Benke et al. 1999              |
| Ephemeroptera | Heptageniidae     | Larvae     | Family (Heptageniidae)            | $0.0108*L^{2.754}$             | Benke et al. 1999              |
| Ephemeroptera | Leptophlebiidae   | Larvae     | Family (Leptophlebiidae)          | $0.0047*L^{2.686}$             | Benke et al. 1999              |
| Hydracarina   |                   | Adult      | Order (Hydracarina)               | $\exp(-2.02+1.66*\log(L))$     | Baumgartner and Rothhaupt 2003 |
| Ostracoda     |                   | Adult      | Order (Amphipoda)                 | $0.0058*L^{3.015}$             | Benke et al. 1999              |
| Plecoptera    | Chloroperlidae    | Larvae     | Family (Chloroperlidae)           | $0.0065*L^{2.724}$             | Benke et al. 1999              |
| Plecoptera    | Nemouridae        | Larvae     | Family (Nemouridae)               | $0.0056*L^{2.762}$             | Benke et al. 1999              |
| Plecoptera    | Perlidae          | Larvae     | Family (Perlidae)                 | $0.0099*L^{2.879}$             | Benke et al. 1999              |
| Trichoptera   | Glossosomatidae   | Larvae     | Family (Glossosomatidae)          | $0.0082*L^{2.958}$             | Benke et al. 1999              |
| Trichoptera   | Hydropsychidae    | Larvae     | Family (Hydropsychidae)           | $0.0046*L^{2.926}$             | Benke et al. 1999              |
| Trichoptera   | Lepidostomatidae  | Larvae     | Family (Lepidostomatidae)         | $0.0079*L^{2.649}$             | Benke et al. 1999              |
| Trichoptera   | Polycentropodidae | Larvae     | Family (Polycentropodidae)        | $0.0047*L^{2.705}$             | Benke et al. 1999              |
| Trichoptera   | Rhyacophilidae    | Larvae     | Family (Rhyacophilidae)           | $0.0099*L^{2.48}$              | Benke et al. 1999              |

96 **Table S2.** Sample sizes and body lengths for seven prey taxa that were fed to reticulate sculpin  
 97 in laboratory feeding trials and used to estimate prey identification times (table modified from  
 98 Preston et al. 2018). Lengths are in millimeters. Multiple invertebrate families were included  
 99 within some orders as follows: mayflies (Ameletidae, Baetidae, Heptageniidae,  
 100 Leptophlebiidae), caddisflies (Calamoceratidae, Glossosomatidae, Hydropsychidae,  
 101 Rhyacophilidae), stoneflies (Perlidae, Perlodidae, Nemouridae, Chloroperlidae), and flies  
 102 (Chironomidae, Simuliidae, Athericidae, Ceratopogonidae, Tipulidae).

| Prey Identity             | Sample Size | Min. Length | Max. Length | Mean Length (SD) |
|---------------------------|-------------|-------------|-------------|------------------|
| Mayflies (Ephemeroptera)  | 141         | 0.5         | 9.0         | 5.35 (1.59)      |
| Caddisflies (Trichoptera) | 116         | 2.0         | 15.0        | 5.75 (2.46)      |
| Stoneflies (Plecoptera)   | 106         | 2.0         | 22.0        | 8.2 (3.20)       |
| Flies (Diptera)           | 148         | 2.0         | 26.0        | 6.06 (4.07)      |
| Worms (Annelida)          | 74          | 4.0         | 52.0        | 25.4 (8.27)      |
| Beetles (Coleoptera)      | 51          | 1.5         | 4.0         | 2.87 (0.66)      |
| Snails (Juga plicifera)   | 86          | 3.0         | 15.0        | 4.7 (1.5)        |

103

104

105

106

107

108

109

110

111

112

113

114

115

116

117 **Table S3.** The 25 focal prey taxa, including total counts of individuals recovered from sculpin ('Count'), the number of replicate  
 118 feeding rates estimated ('Feeding Rates'), the prey identification equation that was applied to estimate prey identification times ('Prey  
 119 ID Time Source'), and whether each taxon was included in the analysis of drivers of variation ('Drivers of Variation').

| Order         | Family            | Life Stage | Count | Feeding Rates | Prey ID Time Source | Drivers of Variation |
|---------------|-------------------|------------|-------|---------------|---------------------|----------------------|
| Achatinoidea  | Semisulcospiridae | Adult      | 198   | 23            | Semisulcospiridae   | x                    |
| Annelida      |                   | Adult      | 20    | 13            | Annelida            | x                    |
| Coleoptera    | Elmidae           | Adult      | 203   | 19            | Coleoptera          | x                    |
| Coleoptera    | Elmidae           | Larvae     | 119   | 20            | Coleoptera          | x                    |
| Copepod       |                   | Adult      | 402   | 20            | Ephemeroptera       |                      |
| Diptera       | Ceratopogonidae   | Larvae     | 88    | 13            | Diptera             | x                    |
| Diptera       | Chironomidae      | Larvae     | 4264  | 27            | Diptera             |                      |
| Diptera       | Dixidae           | Larvae     | 70    | 15            | Diptera             |                      |
| Diptera       | Empididae         | Larvae     | 52    | 17            | Diptera             | x                    |
| Diptera       | Psychodidae       | Larvae     | 19    | 12            | Diptera             | x                    |
| Diptera       | Simuliidae        | Larvae     | 203   | 23            | Diptera             | x                    |
| Diptera       | Tipulidae         | Larvae     | 131   | 23            | Diptera             | x                    |
| Ephemeroptera | Baetidae          | Larvae     | 4343  | 27            | Ephemeroptera       | x                    |
| Ephemeroptera | Heptageniidae     | Larvae     | 1208  | 25            | Ephemeroptera       | x                    |
| Ephemeroptera | Leptophlebiidae   | Larvae     | 309   | 23            | Ephemeroptera       | x                    |
| Hydracarina   |                   | Adult      | 106   | 24            | Ephemeroptera       | x                    |
| Ostracoda     |                   | Adult      | 81    | 18            | Trichoptera         |                      |
| Plecoptera    | Chloroperlidae    | Larvae     | 185   | 24            | Plecoptera          | x                    |
| Plecoptera    | Nemouridae        | Larvae     | 401   | 27            | Plecoptera          | x                    |
| Plecoptera    | Perlidae          | Larvae     | 117   | 23            | Plecoptera          | x                    |
| Trichoptera   | Glossosomatidae   | Larvae     | 419   | 24            | Trichoptera         | x                    |
| Trichoptera   | Hydropsychidae    | Larvae     | 217   | 23            | Trichoptera         | x                    |
| Trichoptera   | Lepidostomatidae  | Larvae     | 225   | 19            | Trichoptera         | x                    |
| Trichoptera   | Polycentropodidae | Larvae     | 82    | 15            | Trichoptera         |                      |
| Trichoptera   | Rhyacophilidae    | Larvae     | 102   | 21            | Trichoptera         | x                    |

120

121

**Table S4.** Distribution parameters for the sculpin feeding rate distributions in each survey.

| Stream | Round  | Reach | Mean  | S.D.  | Skewness | Kurtosis | Sample Size |
|--------|--------|-------|-------|-------|----------|----------|-------------|
| Berry  | Summer | R1    | 0.077 | 0.321 | 5.43     | 30.98    | 34          |
| Berry  | Summer | R2    | 0.045 | 0.174 | 5.34     | 30.01    | 33          |
| Berry  | Summer | R3    | 0.071 | 0.209 | 4.41     | 21.50    | 26          |
| Berry  | Fall   | R1    | 0.030 | 0.049 | 2.07     | 6.50     | 15          |
| Berry  | Fall   | R2    | 0.029 | 0.079 | 4.14     | 20.16    | 31          |
| Berry  | Fall   | R3    | 0.077 | 0.105 | 1.35     | 3.10     | 12          |
| Berry  | Spring | R1    | 0.059 | 0.102 | 2.25     | 7.80     | 20          |
| Berry  | Spring | R2    | 0.043 | 0.080 | 1.84     | 4.89     | 24          |
| Berry  | Spring | R3    | 0.051 | 0.100 | 2.11     | 6.24     | 20          |
| Oak    | Summer | R1    | 0.044 | 0.107 | 4.21     | 20.88    | 31          |
| Oak    | Summer | R2    | 0.062 | 0.236 | 5.26     | 29.34    | 33          |
| Oak    | Summer | R3    | 0.080 | 0.286 | 4.94     | 25.97    | 29          |
| Oak    | Fall   | R1    | 0.045 | 0.083 | 2.97     | 11.09    | 17          |
| Oak    | Fall   | R2    | 0.020 | 0.039 | 3.25     | 13.26    | 23          |
| Oak    | Fall   | R3    | 0.033 | 0.088 | 4.45     | 21.55    | 25          |
| Oak    | Spring | R1    | 0.020 | 0.044 | 3.01     | 11.87    | 31          |
| Oak    | Spring | R2    | 0.020 | 0.045 | 2.54     | 7.80     | 30          |
| Oak    | Spring | R3    | 0.038 | 0.084 | 2.71     | 8.70     | 33          |
| Soap   | Summer | R1    | 0.049 | 0.189 | 4.73     | 24.10    | 28          |
| Soap   | Summer | R2    | 0.051 | 0.173 | 4.12     | 18.45    | 38          |
| Soap   | Summer | R3    | 0.040 | 0.146 | 5.19     | 29.55    | 37          |
| Soap   | Fall   | R1    | 0.020 | 0.059 | 3.97     | 17.73    | 23          |
| Soap   | Fall   | R2    | 0.035 | 0.088 | 3.19     | 11.64    | 28          |
| Soap   | Fall   | R3    | 0.028 | 0.072 | 3.89     | 18.12    | 30          |
| Soap   | Spring | R1    | 0.033 | 0.090 | 3.84     | 17.25    | 37          |
| Soap   | Spring | R2    | 0.025 | 0.073 | 3.99     | 18.54    | 38          |
| Soap   | Spring | R3    | 0.021 | 0.059 | 4.12     | 20.54    | 43          |

122

123

124

125

126

127

128

129

130

131

132

133



134 **Table S5.** Model comparison results for GLMMs predicting sculpin feeding rates on 25 prey  
 135 taxa combined. The models include 1) a full model that includes reach identity and season as  
 136 fixed effects, and stream identity and prey taxon as random intercept terms, 2) the full model  
 137 without reach identity, 3) the full model without season, and 4) and intercept only null model that  
 138 includes the random intercept terms but no fixed effects. Marginal R-squared represents variance  
 139 explained by fixed effects and conditional R-squared represents variance explained by fixed and  
 140 random effects.

| Model                  | -LogLike | AICc   | $\Delta$ AICc | Marginal R <sup>2</sup> | Conditional R <sup>2</sup> |
|------------------------|----------|--------|---------------|-------------------------|----------------------------|
| Without reach identity | -805.5   | 1623.3 | 0.0           | 0.04                    | 0.63                       |
| Full model             | -801.6   | 1632.1 | 8.9           | 0.05                    | 0.68                       |
| Intercept only         | -831.6   | 1669.3 | 46.1          | -                       | 0.58                       |
| Without season         | -827.0   | 1678.6 | 55.4          | 0.02                    | 0.64                       |

141  
 142  
 143  
 144  
 145  
 146  
 147  
 148  
 149  
 150  
 151  
 152  
 153  
 154  
 155  
 156

157 **Table S6.** Regression coefficients from general linear models predicting prey-specific sculpin  
 158 feeding rates as a function of prey density, prey mass, predator density, and abiotic variables  
 159 (PC1). Coefficients are shown for the full models with all four predictors.

| Prey Taxon        | Term                   | Coefficient | Std. Error | t value | P value |
|-------------------|------------------------|-------------|------------|---------|---------|
| <b>Aranae</b>     |                        |             |            |         |         |
| Hydracharina      | Intercept              | -1.64       | 2.21       | -0.74   | 0.467   |
| Hydracharina      | Log (prey density)     | -0.06       | 0.20       | -0.29   | 0.775   |
| Hydracharina      | Log (prey mass)        | 1.03        | 0.85       | 1.21    | 0.242   |
| Hydracharina      | Log (predator density) | -0.23       | 0.64       | -0.36   | 0.725   |
| Hydracharina      | Abiotic PC1            | -0.14       | 0.12       | -1.20   | 0.245   |
| <b>Coleoptera</b> |                        |             |            |         |         |
| Elmidae (larvae)  | Intercept              | -5.73       | 1.30       | -4.40   | 0.001   |
| Elmidae (larvae)  | Log (prey density)     | 0.35        | 0.21       | 1.67    | 0.116   |
| Elmidae (larvae)  | Log (prey mass)        | 1.30        | 0.36       | 3.61    | 0.003   |
| Elmidae (larvae)  | Log (predator density) | 0.53        | 0.65       | 0.81    | 0.433   |
| Elmidae (larvae)  | Abiotic PC1            | 0.14        | 0.10       | 1.37    | 0.191   |
| Elmidae (adult)   | Intercept              | -8.18       | 1.71       | -4.77   | 0.000   |
| Elmidae (adult)   | Log (prey density)     | 0.68        | 0.32       | 2.14    | 0.051   |
| Elmidae (adult)   | Log (prey mass)        | 1.24        | 0.88       | 1.42    | 0.178   |
| Elmidae (adult)   | Log (predator density) | 0.14        | 1.25       | 0.11    | 0.911   |
| Elmidae (adult)   | Abiotic PC1            | -0.13       | 0.22       | -0.59   | 0.562   |
| <b>Diptera</b>    |                        |             |            |         |         |
| Chironomidae      | Intercept              | -3.91       | 1.37       | -2.86   | 0.009   |
| Chironomidae      | Log (prey density)     | 0.48        | 0.23       | 2.10    | 0.048   |
| Chironomidae      | Log (prey mass)        | 0.24        | 0.36       | 0.67    | 0.511   |
| Chironomidae      | Log (predator density) | 0.17        | 0.54       | 0.32    | 0.754   |
| Chironomidae      | Abiotic PC1            | 0.03        | 0.10       | 0.27    | 0.790   |
| Empididae         | Intercept              | -4.13       | 0.86       | -4.82   | 0.001   |
| Empididae         | Log (prey density)     | -0.26       | 0.27       | -0.97   | 0.356   |
| Empididae         | Log (prey mass)        | 0.89        | 0.28       | 3.21    | 0.009   |
| Empididae         | Log (predator density) | 0.33        | 0.83       | 0.39    | 0.701   |
| Empididae         | Abiotic PC1            | -0.46       | 0.15       | -3.02   | 0.013   |
| Psychodidae       | Intercept              | -5.77       | 3.10       | -1.86   | 0.137   |
| Psychodidae       | Log (prey density)     | 0.35        | 0.34       | 1.04    | 0.358   |
| Psychodidae       | Log (prey mass)        | 0.17        | 0.64       | 0.27    | 0.801   |
| Psychodidae       | Log (predator density) | -0.50       | 1.30       | -0.39   | 0.719   |
| Psychodidae       | Abiotic PC1            | -0.20       | 0.24       | -0.83   | 0.451   |
| Simuliidae        | Intercept              | -6.67       | 0.87       | -7.69   | 0.000   |
| Simuliidae        | Log (prey density)     | 0.28        | 0.16       | 1.83    | 0.086   |
| Simuliidae        | Log (prey mass)        | -0.33       | 0.31       | -1.07   | 0.300   |

|                   |                        |       |      |       |       |
|-------------------|------------------------|-------|------|-------|-------|
| Simuliidae        | Log (predator density) | 0.77  | 0.61 | 1.25  | 0.230 |
| Simuliidae        | Abiotic PC1            | 0.01  | 0.13 | 0.06  | 0.954 |
| Tipulidae         | Intercept              | -6.38 | 0.99 | -6.45 | 0.000 |
| Tipulidae         | Log (prey density)     | 0.70  | 0.33 | 2.14  | 0.048 |
| Tipulidae         | Log (prey mass)        | -0.10 | 0.16 | -0.66 | 0.516 |
| Tipulidae         | Log (predator density) | 0.08  | 0.79 | 0.10  | 0.923 |
| Tipulidae         | Abiotic PC1            | -0.24 | 0.14 | -1.74 | 0.101 |
| Ephemeroptera     |                        |       |      |       |       |
| Baetidae          | Intercept              | -6.36 | 1.81 | -3.50 | 0.002 |
| Baetidae          | Log (prey density)     | 0.65  | 0.30 | 2.18  | 0.041 |
| Baetidae          | Log (prey mass)        | -0.71 | 0.48 | -1.48 | 0.154 |
| Baetidae          | Log (predator density) | 0.81  | 0.58 | 1.40  | 0.177 |
| Baetidae          | Abiotic PC1            | -0.07 | 0.13 | -0.57 | 0.576 |
| Heptageniidae     | Intercept              | -7.27 | 1.53 | -4.75 | 0.000 |
| Heptageniidae     | Log (prey density)     | 0.95  | 0.26 | 3.65  | 0.002 |
| Heptageniidae     | Log (prey mass)        | 0.73  | 0.24 | 3.00  | 0.007 |
| Heptageniidae     | Log (predator density) | 0.51  | 0.76 | 0.67  | 0.509 |
| Heptageniidae     | Abiotic PC1            | 0.30  | 0.16 | 1.90  | 0.072 |
| Leptophlebiidae   | Intercept              | -6.47 | 2.10 | -3.07 | 0.007 |
| Leptophlebiidae   | Log (prey density)     | 0.88  | 0.33 | 2.69  | 0.015 |
| Leptophlebiidae   | Log (prey mass)        | 0.17  | 0.53 | 0.33  | 0.748 |
| Leptophlebiidae   | Log (predator density) | -0.71 | 0.92 | -0.77 | 0.448 |
| Leptophlebiidae   | Abiotic PC1            | 0.30  | 0.22 | 1.34  | 0.196 |
| Gastropoda        |                        |       |      |       |       |
| Semisulcospiridae | Intercept              | -8.51 | 1.28 | -6.65 | 0.000 |
| Semisulcospiridae | Log (prey density)     | 0.21  | 0.23 | 0.92  | 0.377 |
| Semisulcospiridae | Log (prey mass)        | -0.11 | 0.11 | -1.01 | 0.334 |
| Semisulcospiridae | Log (predator density) | 1.30  | 1.00 | 1.30  | 0.219 |
| Semisulcospiridae | Abiotic PC1            | -0.42 | 0.27 | -1.58 | 0.143 |
| Oligochaeta       |                        |       |      |       |       |
| Annelida          | Intercept              | -3.35 | 6.03 | -0.56 | 0.594 |
| Annelida          | Log (prey density)     | 0.70  | 1.03 | 0.68  | 0.513 |
| Annelida          | Log (prey mass)        | 0.14  | 0.48 | 0.30  | 0.774 |
| Annelida          | Log (predator density) | -2.52 | 3.78 | -0.67 | 0.523 |
| Annelida          | Abiotic PC1            | -0.77 | 0.38 | -2.01 | 0.079 |
| Plecoptera        |                        |       |      |       |       |
| Chloroperlidae    | Intercept              | -7.31 | 1.56 | -4.69 | 0.000 |
| Chloroperlidae    | Log (prey density)     | 0.86  | 0.44 | 1.96  | 0.066 |
| Chloroperlidae    | Log (prey mass)        | -0.43 | 0.66 | -0.65 | 0.525 |
| Chloroperlidae    | Log (predator density) | -1.25 | 1.10 | -1.14 | 0.268 |

|                  |                        |       |      |       |       |
|------------------|------------------------|-------|------|-------|-------|
| Chloroperlidae   | Abiotic PC1            | 0.08  | 0.21 | 0.36  | 0.720 |
| Nemouridae       | Intercept              | -2.48 | 2.60 | -0.95 | 0.351 |
| Nemouridae       | Log (prey density)     | 0.89  | 0.32 | 2.81  | 0.010 |
| Nemouridae       | Log (prey mass)        | 1.16  | 0.67 | 1.73  | 0.098 |
| Nemouridae       | Log (predator density) | -1.15 | 0.78 | -1.47 | 0.156 |
| Nemouridae       | Abiotic PC1            | 0.24  | 0.17 | 1.43  | 0.167 |
| Perlidae         | Intercept              | -7.46 | 1.06 | -7.02 | 0.000 |
| Perlidae         | Log(pre y density)     | 0.79  | 0.24 | 3.30  | 0.004 |
| Perlidae         | Log (prey mass)        | -0.05 | 0.15 | -0.33 | 0.748 |
| Perlidae         | Log (predator density) | -0.06 | 0.52 | -0.12 | 0.906 |
| Perlidae         | Abiotic PC1            | -0.16 | 0.10 | -1.63 | 0.121 |
| Trichoptera      |                        |       |      |       |       |
| Glossosomatidae  | Intercept              | -4.76 | 1.20 | -3.97 | 0.001 |
| Glossosomatidae  | Log (prey density)     | 0.20  | 0.29 | 0.68  | 0.505 |
| Glossosomatidae  | Log (prey mass)        | 0.16  | 0.27 | 0.59  | 0.560 |
| Glossosomatidae  | Log (predator density) | -0.17 | 0.99 | -0.18 | 0.863 |
| Glossosomatidae  | Abiotic PC1            | -0.33 | 0.21 | -1.62 | 0.122 |
| Hydropsychidae   | Intercept              | -6.25 | 1.44 | -4.33 | 0.001 |
| Hydropsychidae   | Log (prey density)     | 0.33  | 0.29 | 1.13  | 0.276 |
| Hydropsychidae   | Log (prey mass)        | 0.27  | 0.23 | 1.17  | 0.260 |
| Hydropsychidae   | Log (predator density) | 0.39  | 1.17 | 0.33  | 0.746 |
| Hydropsychidae   | Abiotic PC1            | -0.71 | 0.22 | -3.22 | 0.005 |
| Lepidostomatidae | Intercept              | -7.48 | 1.05 | -7.12 | 0.000 |
| Lepidostomatidae | Log (prey density)     | 0.42  | 0.26 | 1.65  | 0.126 |
| Lepidostomatidae | Log (prey mass)        | -0.49 | 0.38 | -1.28 | 0.225 |
| Lepidostomatidae | Log (predator density) | -0.09 | 1.11 | -0.08 | 0.938 |
| Lepidostomatidae | Abiotic PC1            | -0.55 | 0.40 | -1.36 | 0.198 |
| Rhyacophilidae   | Intercept              | -5.03 | 0.70 | -7.18 | 0.000 |
| Rhyacophilidae   | Log (prey density)     | 0.10  | 0.14 | 0.71  | 0.493 |
| Rhyacophilidae   | Log (prey mass)        | 0.14  | 0.20 | 0.70  | 0.494 |
| Rhyacophilidae   | Log (predator density) | -1.27 | 0.83 | -1.52 | 0.152 |
| Rhyacophilidae   | Abiotic PC1            | -0.52 | 0.16 | -3.16 | 0.007 |

160

161

162

163

164 **Table S7.** Comparisons of general linear models predicting prey-specific sculpin feeding rates.  
 165 For each prey taxon, the models include 1) a full model with prey density, prey mass, predator  
 166 density, and abiotic variables, 2) a model with prey density, 3) a model with prey mass, 4) a  
 167 model with predator density, 5) a model with abiotic factors, and 6) an intercept only null model.

| Prey Taxon        | Model            | -LogLike | AICc | $\Delta$ AICc | R2   |
|-------------------|------------------|----------|------|---------------|------|
| <b>Aranae</b>     |                  |          |      |               |      |
| Hydracharina      | Prey Mass        | -21.3    | 49.9 | 0.0           | 0.16 |
| Hydracharina      | PC1              | -21.6    | 50.4 | 0.5           | 0.14 |
| Hydracharina      | Intercept Only   | -23.4    | 51.4 | 1.5           | 0.00 |
| Hydracharina      | Predator Density | -22.8    | 52.8 | 3.0           | 0.05 |
| Hydracharina      | Prey Density     | -23.4    | 54.0 | 4.1           | 0.00 |
| Hydracharina      | Full Model       | -20.3    | 57.6 | 7.7           | 0.23 |
| <b>Coleoptera</b> |                  |          |      |               |      |
| Elmidae (larvae)  | Prey Mass        | -19.2    | 45.9 | 0.0           | 0.34 |
| Elmidae (larvae)  | Full Model       | -16.5    | 51.4 | 5.5           | 0.50 |
| Elmidae (larvae)  | Intercept Only   | -23.4    | 51.5 | 5.6           | 0.00 |
| Elmidae (larvae)  | Predator Density | -23.0    | 53.6 | 7.7           | 0.03 |
| Elmidae (larvae)  | Prey Density     | -23.3    | 54.0 | 8.1           | 0.01 |
| Elmidae (larvae)  | PC1              | -23.4    | 54.3 | 8.4           | 0.00 |
| Elmidae (adult)   | Prey Density     | -29.6    | 66.7 | 0.0           | 0.23 |
| Elmidae (adult)   | Intercept Only   | -32.1    | 68.9 | 2.2           | 0.00 |
| Elmidae (adult)   | Prey Mass        | -30.9    | 69.4 | 2.7           | 0.12 |
| Elmidae (adult)   | PC1              | -31.1    | 69.8 | 3.0           | 0.10 |
| Elmidae (adult)   | Predator Density | -32.1    | 71.8 | 5.0           | 0.00 |
| Elmidae (adult)   | Full Model       | -27.6    | 74.1 | 7.4           | 0.38 |
| <b>Diptera</b>    |                  |          |      |               |      |
| Chironomidae      | Prey Density     | -22.0    | 51.1 | 0.0           | 0.18 |
| Chironomidae      | Intercept Only   | -24.6    | 53.7 | 2.6           | 0.00 |
| Chironomidae      | PC1              | -24.2    | 55.5 | 4.5           | 0.03 |
| Chironomidae      | Predator Density | -24.5    | 56.2 | 5.1           | 0.00 |
| Chironomidae      | Prey Mass        | -24.5    | 56.2 | 5.1           | 0.00 |
| Chironomidae      | Full Model       | -21.7    | 59.8 | 8.8           | 0.20 |
| Empididae         | PC1              | -18.4    | 45.0 | 0.0           | 0.39 |
| Empididae         | Prey Mass        | -20.0    | 48.1 | 3.1           | 0.25 |
| Empididae         | Full Model       | -12.9    | 48.3 | 3.3           | 0.71 |
| Empididae         | Intercept Only   | -22.1    | 49.3 | 4.3           | 0.00 |
| Empididae         | Predator Density | -21.4    | 51.0 | 6.0           | 0.09 |
| Empididae         | Prey Density     | -21.8    | 51.8 | 6.8           | 0.04 |
| Psychodidae       | Intercept Only   | -7.9     | 21.7 | 0.0           | 0.00 |
| Psychodidae       | Prey Density     | -6.8     | 24.4 | 2.7           | 0.21 |

|                   |                  |       |      |      |      |
|-------------------|------------------|-------|------|------|------|
| Psychodidae       | PC1              | -7.3  | 25.5 | 3.7  | 0.11 |
| Psychodidae       | Prey Mass        | -7.7  | 26.1 | 4.4  | 0.04 |
| Psychodidae       | Predator Density | -7.9  | 26.5 | 4.8  | 0.00 |
| Psychodidae       | Full Model       | -6.0  | 66.0 | 44.3 | 0.34 |
| Simulidae         | Prey Mass        | -21.6 | 50.7 | 0.0  | 0.14 |
| Simulidae         | Intercept Only   | -23.2 | 51.0 | 0.3  | 0.00 |
| Simulidae         | Prey Density     | -22.0 | 51.4 | 0.7  | 0.11 |
| Simulidae         | Predator Density | -22.1 | 51.5 | 0.8  | 0.10 |
| Simulidae         | PC1              | -22.4 | 52.3 | 1.6  | 0.07 |
| Simulidae         | Full Model       | -19.2 | 56.3 | 5.7  | 0.32 |
| Tipulidae         | Prey Density     | -25.8 | 59.0 | 0.0  | 0.26 |
| Tipulidae         | PC1              | -25.8 | 59.0 | 0.0  | 0.26 |
| Tipulidae         | Intercept Only   | -29.0 | 62.6 | 3.6  | 0.00 |
| Tipulidae         | Full Model       | -22.7 | 63.4 | 4.4  | 0.45 |
| Tipulidae         | Prey Mass        | -29.0 | 65.4 | 6.4  | 0.00 |
| Tipulidae         | Predator Density | -29.0 | 65.4 | 6.4  | 0.00 |
| Ephemeroptera     |                  |       |      |      |      |
| Baetidae          | Full Model       | -23.3 | 63.1 | 0.0  | 0.50 |
| Baetidae          | Predator Density | -28.3 | 63.8 | 0.7  | 0.27 |
| Baetidae          | Prey Mass        | -28.7 | 64.5 | 1.4  | 0.25 |
| Baetidae          | PC1              | -29.5 | 66.1 | 3.0  | 0.20 |
| Baetidae          | Prey Density     | -29.8 | 66.6 | 3.5  | 0.18 |
| Baetidae          | Intercept Only   | -32.4 | 69.3 | 6.2  | 0.00 |
| Heptageniidae     | Full Model       | -24.5 | 65.9 | 0.0  | 0.81 |
| Heptageniidae     | PC1              | -33.8 | 74.8 | 8.9  | 0.58 |
| Heptageniidae     | Prey Density     | -33.8 | 74.9 | 8.9  | 0.58 |
| Heptageniidae     | Prey Mass        | -37.6 | 82.3 | 16.4 | 0.42 |
| Heptageniidae     | Predator Density | -42.8 | 92.8 | 26.8 | 0.11 |
| Heptageniidae     | Intercept Only   | -44.2 | 93.0 | 27.0 | 0.00 |
| Leptophlebiidae   | Prey Density     | -33.5 | 74.2 | 0.0  | 0.17 |
| Leptophlebiidae   | Intercept Only   | -35.7 | 76.0 | 1.7  | 0.00 |
| Leptophlebiidae   | Predator Density | -35.2 | 77.7 | 3.4  | 0.04 |
| Leptophlebiidae   | Prey Mass        | -35.7 | 78.6 | 4.3  | 0.00 |
| Leptophlebiidae   | PC1              | -35.7 | 78.6 | 4.4  | 0.00 |
| Leptophlebiidae   | Full Model       | -31.2 | 79.7 | 5.4  | 0.32 |
| Gastropoda        |                  |       |      |      |      |
| Semisulcospiridae | Full Model       | -16.0 | 53.3 | 0.0  | 0.70 |
| Semisulcospiridae | PC1              | -23.7 | 54.6 | 1.4  | 0.62 |
| Semisulcospiridae | Prey Mass        | -23.8 | 55.7 | 2.4  | 0.20 |
| Semisulcospiridae | Prey Density     | -29.9 | 67.1 | 13.8 | 0.35 |

|                   |                  |       |      |      |      |
|-------------------|------------------|-------|------|------|------|
| Semisulcospiridae | Intercept Only   | -34.8 | 74.3 | 21.0 | 0.00 |
| Semisulcospiridae | Predator Density | -33.9 | 75.0 | 21.7 | 0.08 |
| <hr/>             |                  |       |      |      |      |
| Oligochaeta       |                  |       |      |      |      |
| Annelida          | PC1              | -22.7 | 54.0 | 0.0  | 0.38 |
| Annelida          | Prey Density     | -23.3 | 55.2 | 1.2  | 0.32 |
| Annelida          | Intercept Only   | -25.8 | 56.8 | 2.7  | 0.00 |
| Annelida          | Prey Mass        | -25.7 | 60.0 | 6.0  | 0.01 |
| Annelida          | Predator Density | -25.8 | 60.2 | 6.2  | 0.00 |
| Annelida          | Full Model       | -19.3 | 64.6 | 10.6 | 0.63 |
| <hr/>             |                  |       |      |      |      |
| Plecoptera        |                  |       |      |      |      |
| Chloroperlidae    | Intercept Only   | -27.6 | 59.8 | 0.0  | 0.00 |
| Chloroperlidae    | Prey Density     | -26.6 | 60.4 | 0.6  | 0.08 |
| Chloroperlidae    | Prey Mass        | -27.4 | 62.2 | 2.4  | 0.01 |
| Chloroperlidae    | Predator Density | -27.5 | 62.2 | 2.5  | 0.01 |
| Chloroperlidae    | PC1              | -27.5 | 62.3 | 2.5  | 0.01 |
| Chloroperlidae    | Full Model       | -24.7 | 66.6 | 6.8  | 0.22 |
| <hr/>             |                  |       |      |      |      |
| Nemouridae        | Prey Density     | -34.3 | 75.6 | 0.0  | 0.14 |
| Nemouridae        | Intercept Only   | -36.2 | 77.0 | 1.3  | 0.00 |
| Nemouridae        | Predator Density | -35.5 | 78.1 | 2.4  | 0.06 |
| Nemouridae        | Full Model       | -31.1 | 78.6 | 2.9  | 0.33 |
| Nemouridae        | PC1              | -36.2 | 79.5 | 3.9  | 0.00 |
| Nemouridae        | Prey Mass        | -36.2 | 79.6 | 3.9  | 0.00 |
| <hr/>             |                  |       |      |      |      |
| Perlidae          | Prey Density     | -19.4 | 46.1 | 0.0  | 0.54 |
| Perlidae          | Full Model       | -17.7 | 52.7 | 6.6  | 0.60 |
| Perlidae          | PC1              | -25.5 | 58.3 | 12.2 | 0.21 |
| Perlidae          | Prey Mass        | -26.7 | 60.6 | 14.6 | 0.13 |
| Perlidae          | Intercept Only   | -28.3 | 61.1 | 15.1 | 0.00 |
| Perlidae          | Predator Density | -28.2 | 63.8 | 17.7 | 0.00 |
| <hr/>             |                  |       |      |      |      |
| Trichoptera       |                  |       |      |      |      |
| Glossosomatidae   | PC1              | -36.2 | 79.7 | 0.0  | 0.17 |
| Glossosomatidae   | Prey Density     | -37.0 | 81.1 | 1.5  | 0.11 |
| Glossosomatidae   | Intercept Only   | -38.4 | 81.4 | 1.8  | 0.00 |
| Glossosomatidae   | Predator Density | -38.3 | 83.9 | 4.2  | 0.01 |
| Glossosomatidae   | Prey Mass        | -38.4 | 84.0 | 4.3  | 0.00 |
| Glossosomatidae   | Full Model       | -35.4 | 87.7 | 8.0  | 0.22 |
| <hr/>             |                  |       |      |      |      |
| Hydropsychidae    | PC1              | -25.4 | 58.2 | 0.0  | 0.62 |
| Hydropsychidae    | Full Model       | -24.2 | 66.3 | 8.1  | 0.66 |
| Hydropsychidae    | Prey Density     | -29.9 | 67.2 | 9.0  | 0.42 |
| Hydropsychidae    | Prey Mass        | -32.1 | 71.7 | 13.5 | 0.28 |
| Hydropsychidae    | Intercept Only   | -35.6 | 75.9 | 17.6 | 0.00 |

|                  |                  |       |      |      |      |
|------------------|------------------|-------|------|------|------|
| Hydropsychidae   | Predator Density | -34.9 | 77.1 | 18.9 | 0.07 |
| Lepidostomatidae | Prey Density     | -23.1 | 54.0 | 0.0  | 0.49 |
| Lepidostomatidae | PC1              | -25.9 | 59.7 | 5.7  | 0.28 |
| Lepidostomatidae | Intercept Only   | -28.7 | 62.3 | 8.4  | 0.00 |
| Lepidostomatidae | Predator Density | -27.5 | 62.8 | 8.8  | 0.14 |
| Lepidostomatidae | Full Model       | -21.6 | 63.7 | 9.7  | 0.57 |
| Lepidostomatidae | Prey Mass        | -28.7 | 65.2 | 11.2 | 0.01 |
| Rhyacophilidae   | PC1              | -19.8 | 47.3 | 0.0  | 0.44 |
| Rhyacophilidae   | Intercept Only   | -25.0 | 54.9 | 7.5  | 0.00 |
| Rhyacophilidae   | Full Model       | -18.2 | 56.0 | 8.6  | 0.53 |
| Rhyacophilidae   | Prey Mass        | -24.2 | 56.2 | 8.8  | 0.08 |
| Rhyacophilidae   | Prey Density     | -24.3 | 56.2 | 8.9  | 0.08 |
| Rhyacophilidae   | Predator Density | -25.0 | 57.7 | 10.4 | 0.00 |

168

169

170

171

172

173

174

175

176

177

178

179

180

181



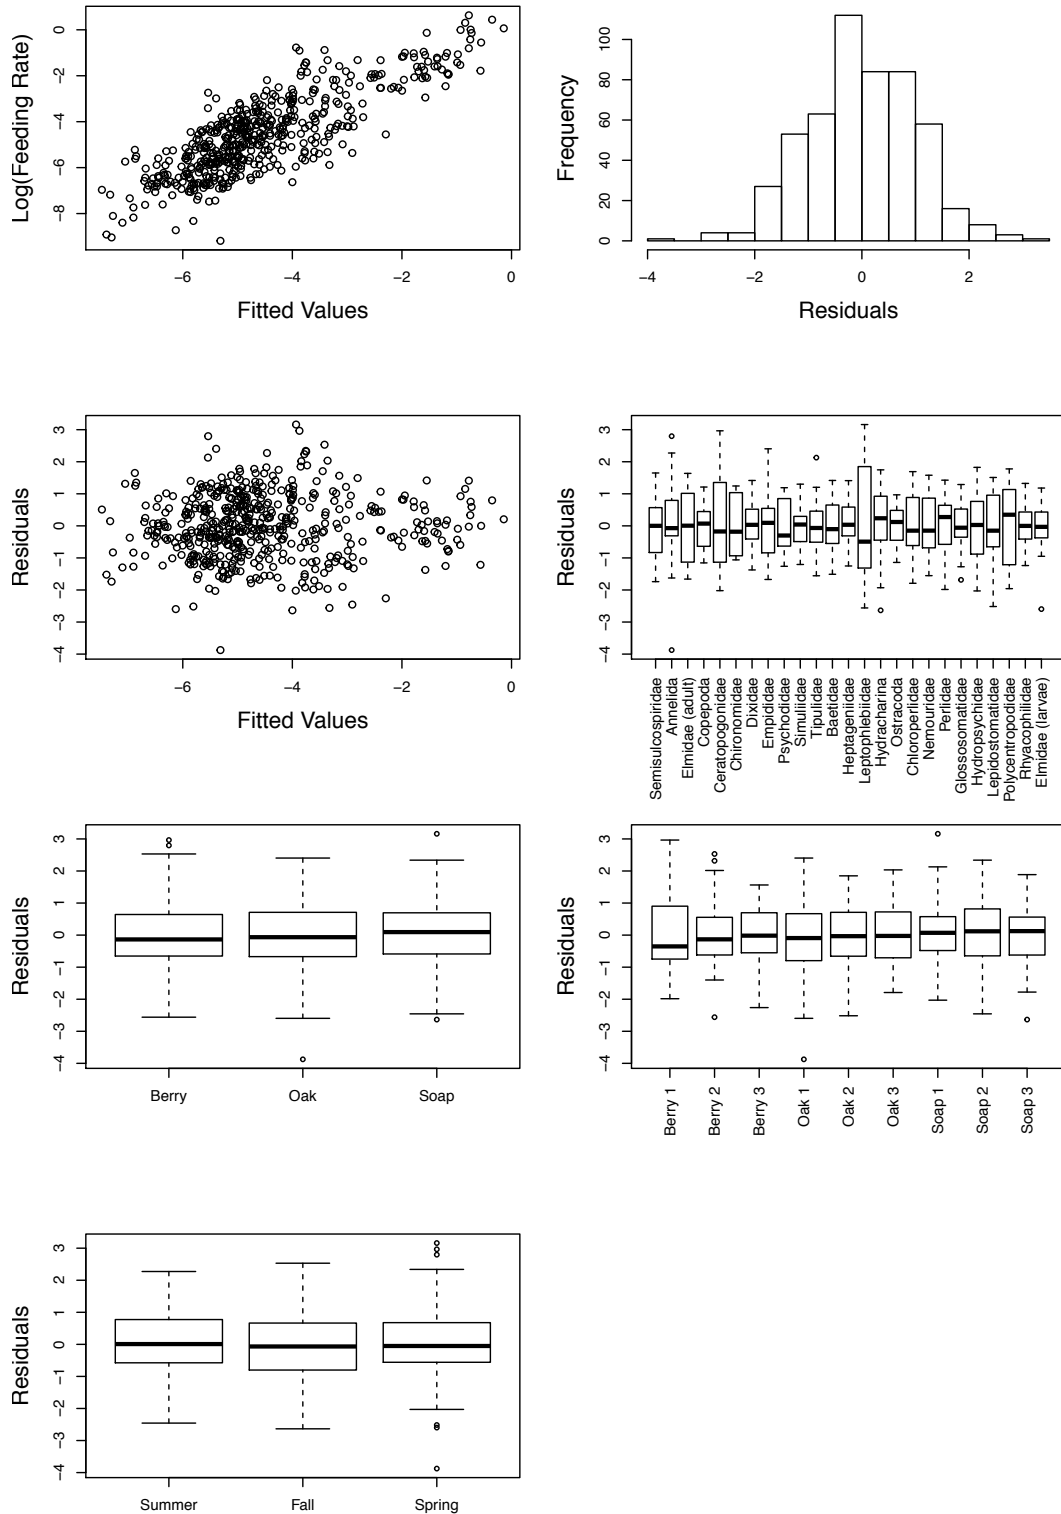

182  
 183 **Figure S1.** Residual patterns for the GLMM predicting sculpin feeding rates that includes fixed  
 184 effects of reach identity and season, and random intercept terms for prey taxon and stream (the  
 185 ‘full model’). The plots include: fitted values versus the response variable; a histogram of the  
 186 residuals; residuals versus fitted values; and residuals for each prey taxon, each reach, and each  
 187 season.

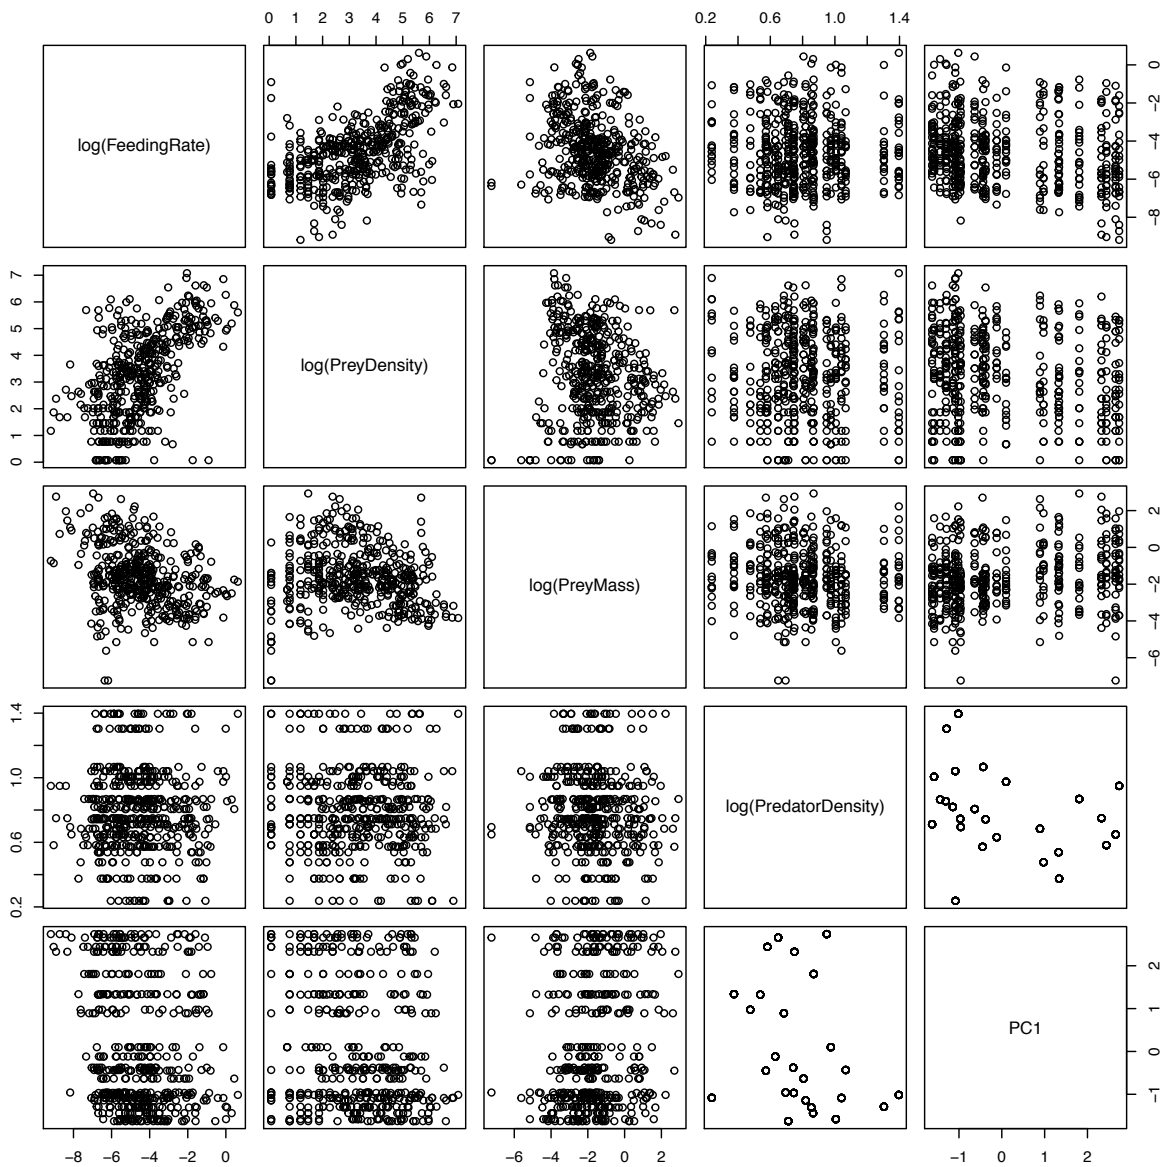

188  
 189 **Figure S2.** Correlations among predictor variables for the general linear models predicting prey-  
 190 specific sculpin feeding rates as a function prey density, prey mass, predator density, and abiotic  
 191 variables (PC1).

192

193

194

195

196

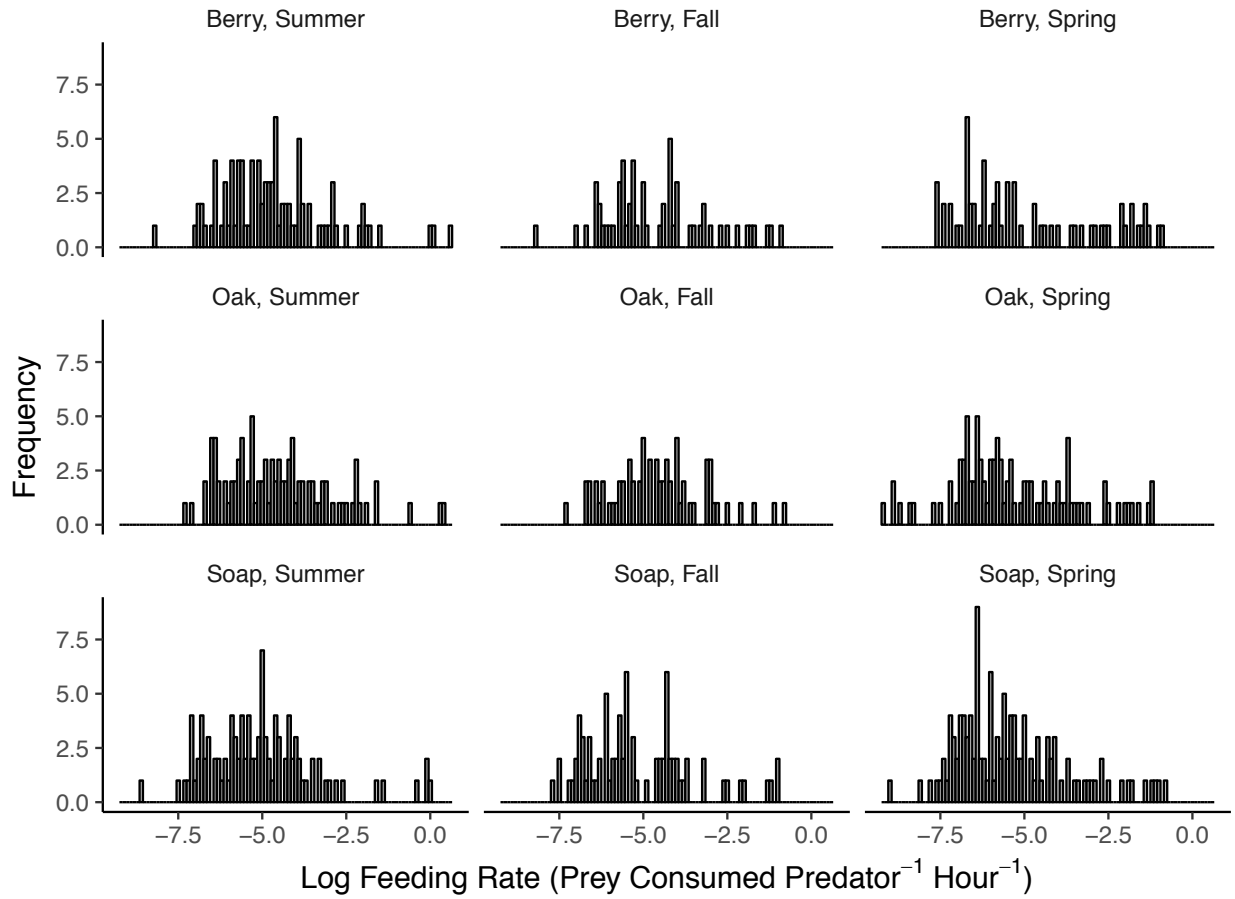

198

199 **Figure S3.** Frequency distributions of sculpin feeding rates at each stream (three reaches  
200 combined) in each season.

201

202

203

204

205

206

207

208

209

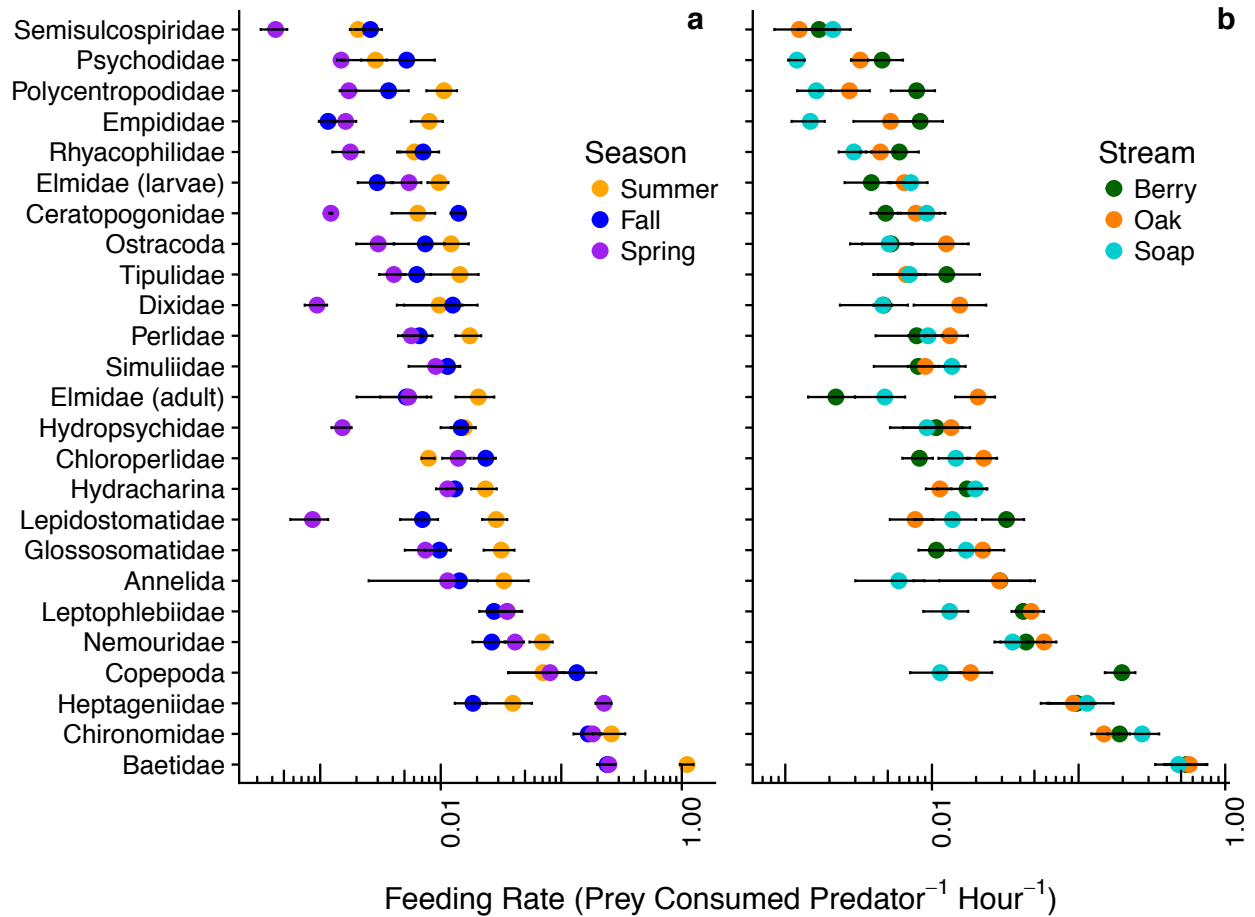

210

211 **Figure S4.** Mean prey-specific feeding rates for the three seasons (a) and three streams (b).  
 212 Feeding rates are ordered by their means across all surveys. This figure corresponds to the  
 213 Spearman rank correlations presented in the main text for seasonal and stream-level differences  
 214 in the rank order of feeding rates.

215

216

217

218

219

220

221

222

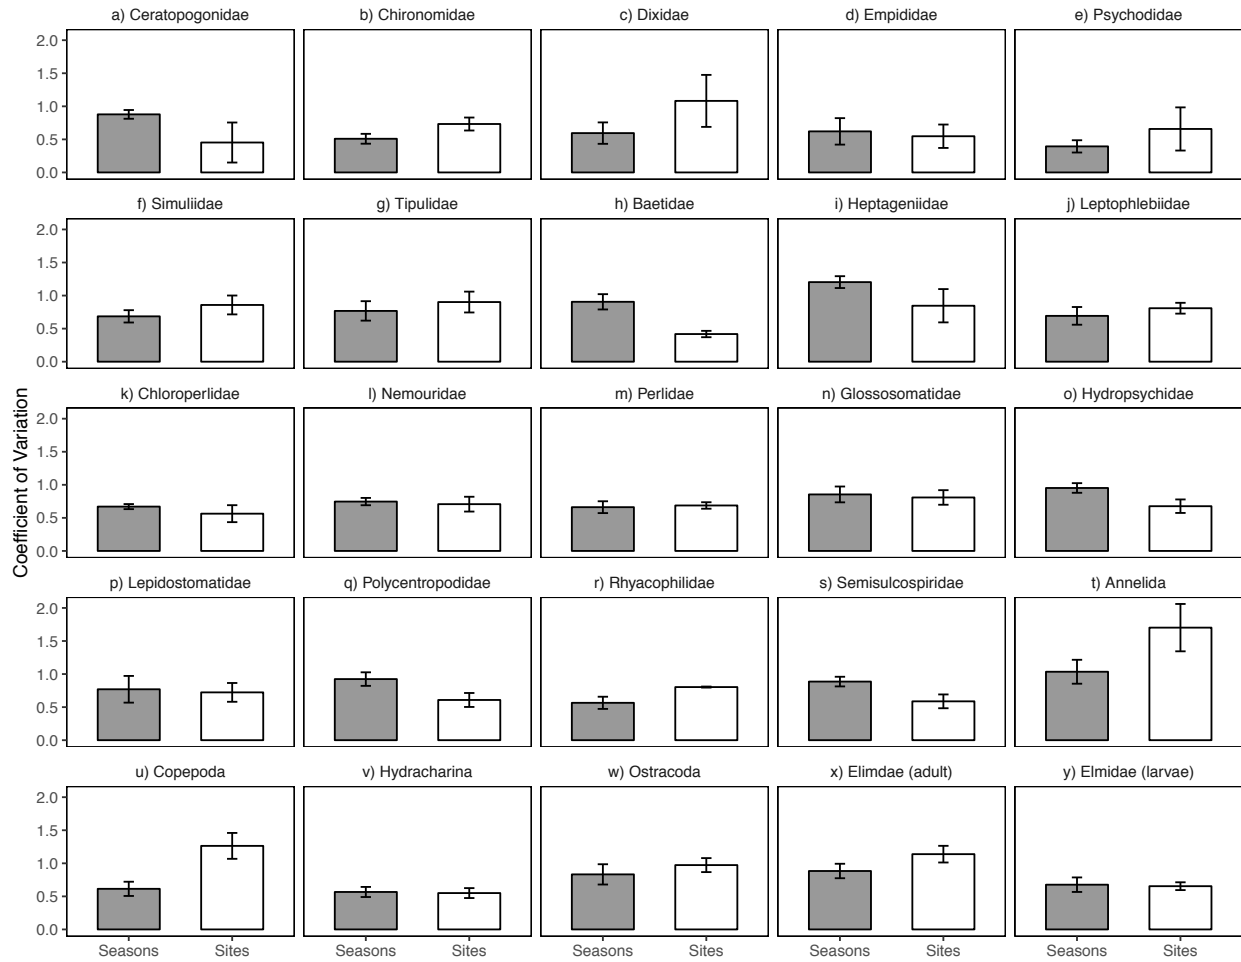

223 **Figure S5.** Coefficient of variation for prey-specific sculpin feeding rates across seasons (n = 3  
 224 seasons) and across stream reaches (n = 9 sites). Bars show means with standard errors.  
 225  
 226

227

228

229

230

231

232

233

234

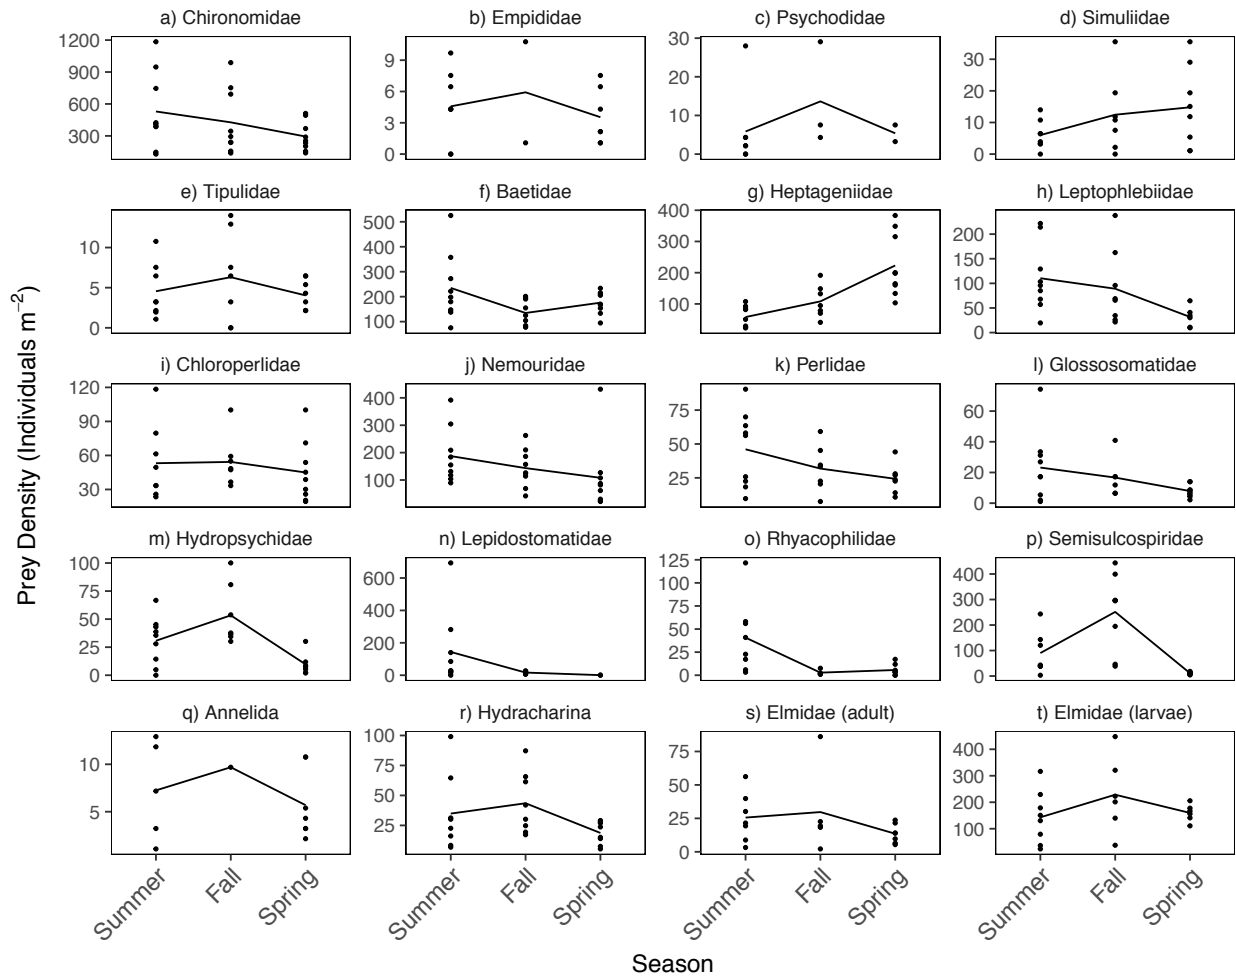

235  
 236 **Figure S6.** Seasonal changes in prey density. The line shows seasonal means and each point  
 237 represents a stream reach. Note the varying y-axis.  
 238

239

240

241

242

243

244

245

246

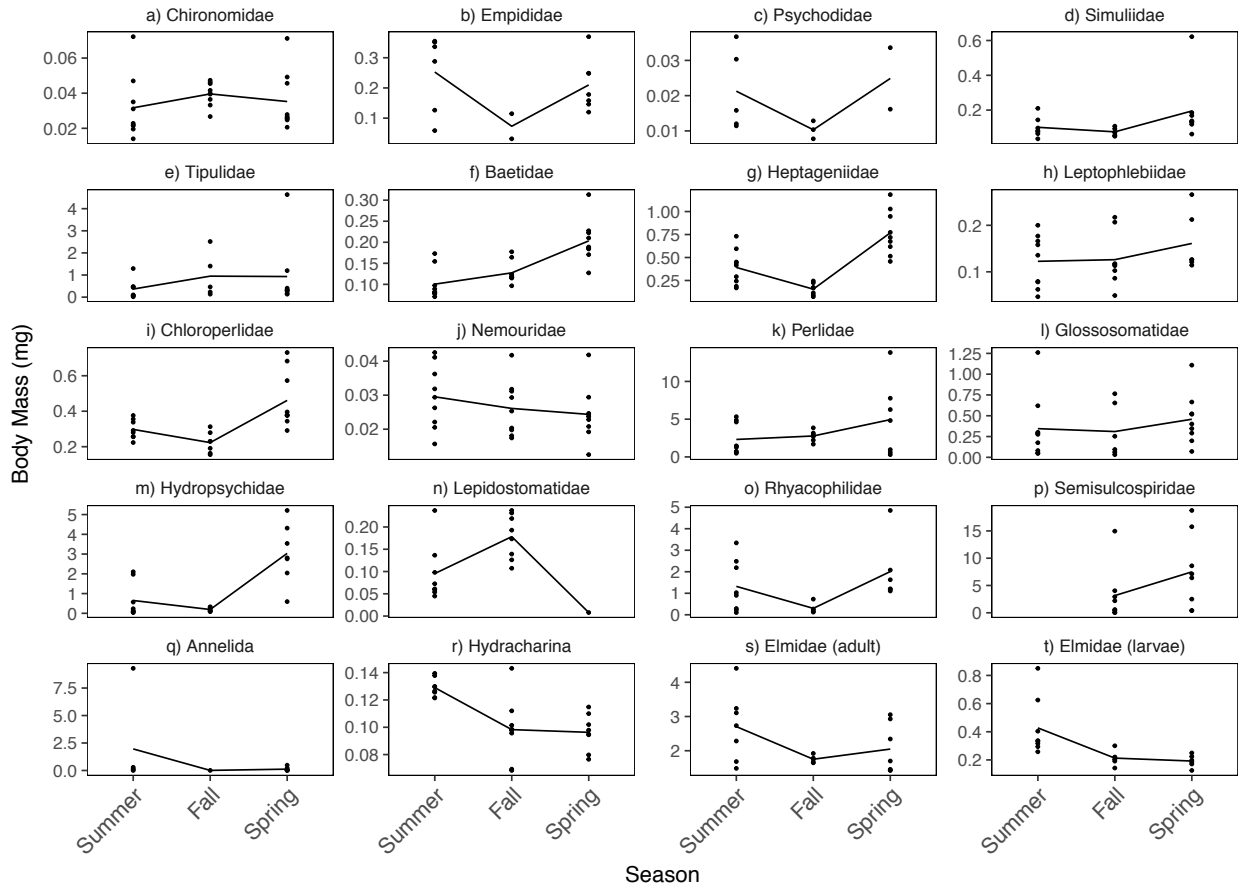

247  
 248 **Figure S7.** Seasonal changes in prey dry biomass. The line shows seasonal means and each point  
 249 represents a stream reach. Note the varying y-axis.  
 250

251  
 252  
 253  
 254  
 255  
 256  
 257  
 258  
 259

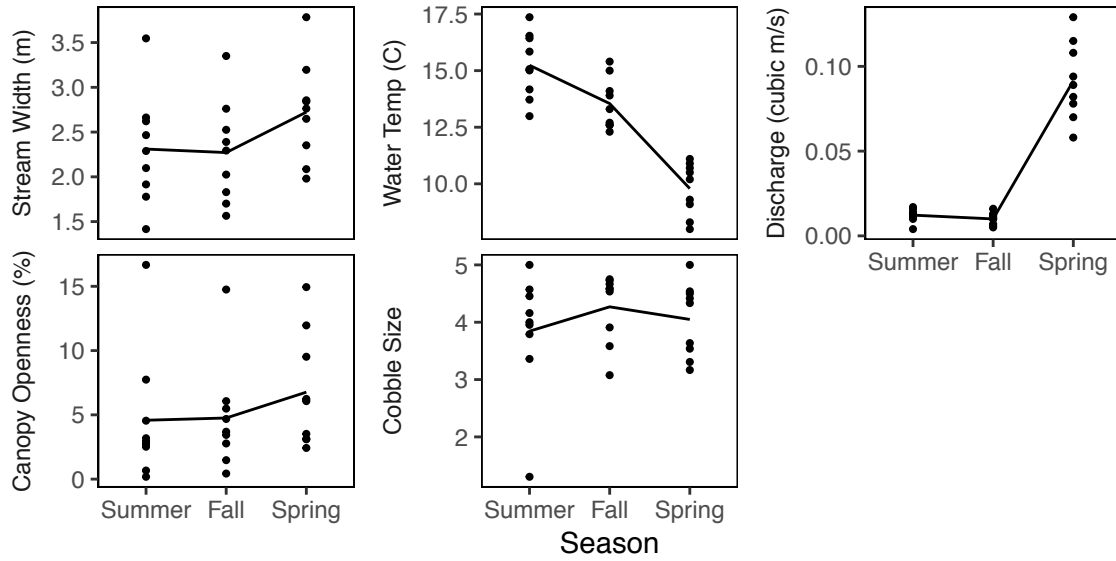

260  
 261 **Figure S8.** Seasonal changes in abiotic variables. The line shows seasonal means and each point  
 262 represents a stream reach. Cobble size was scored on a relative scale from one (low  
 263 embeddedness) to five (high embeddedness).  
 264

265

266

267

268

269

270

271

272

273

274

275

276

277



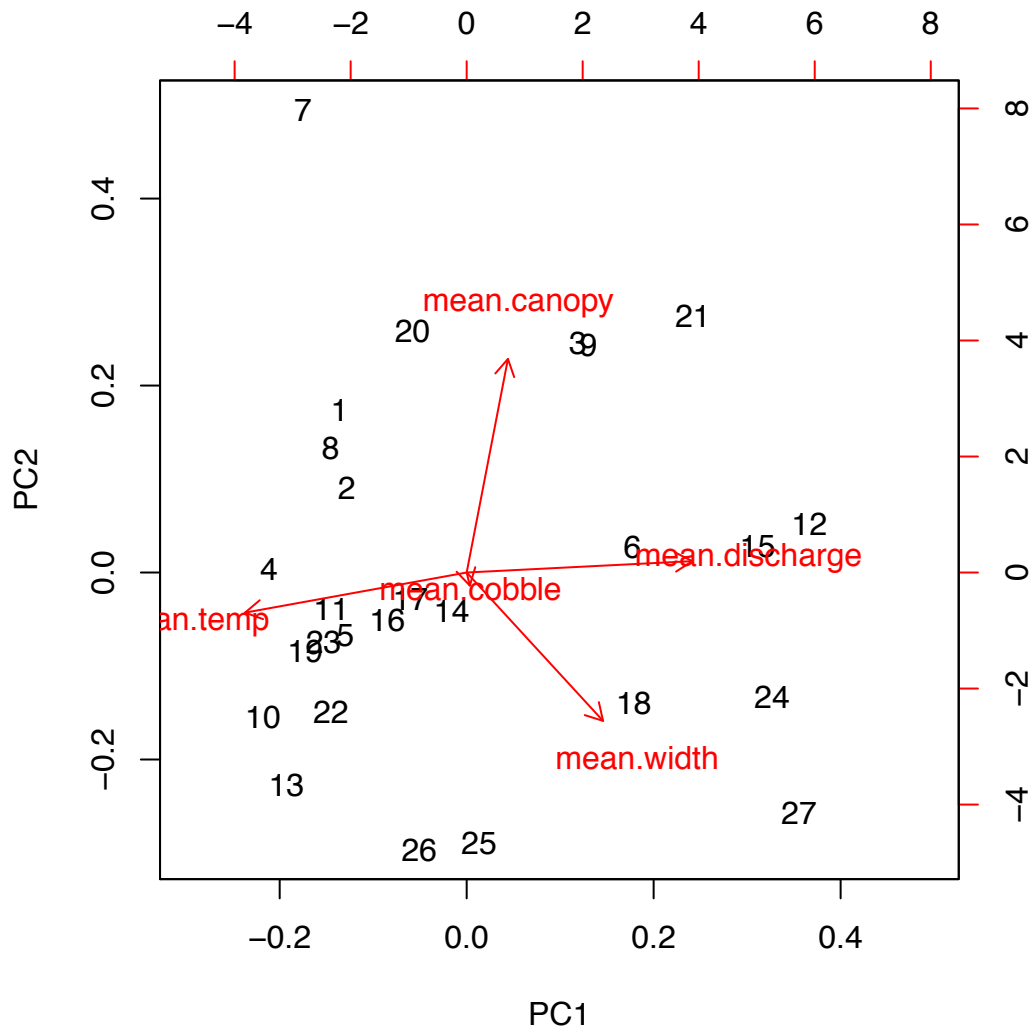

278  
 279 **Figure S9.** Results from a principal components analysis of the five abiotic stream variables  
 280 (using means per stream reach).  
 281

282

283

284

285

286

287

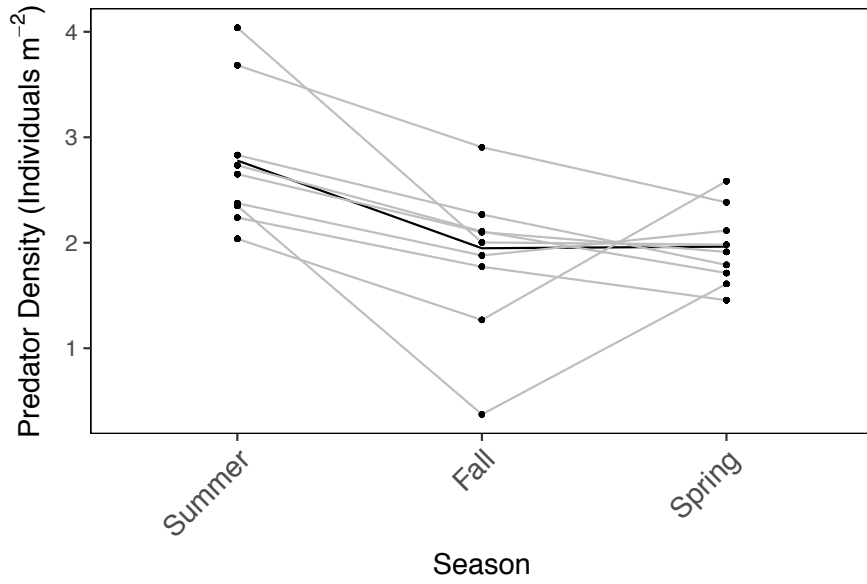

288  
289  
290  
291

**Figure S10.** Changes in sculpin density estimated from mark-recapture corrected one-pass electroshock surveys at each stream reach. The dark line shows the mean and the grey lines connect each individual site.
